# Supplementary material for: Mapping the neural circuitry of predator fear in the nonhuman primate
Source: PubMed Central journal article supplement (PMC7817595; doi:10.1007/s00429-020-02176-6), 2020-12-02

**Fig. S1****A**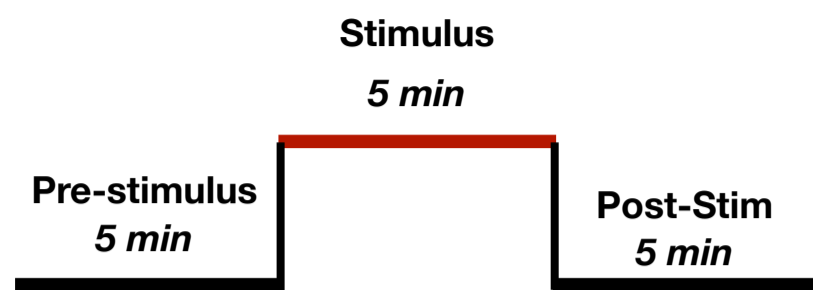**B**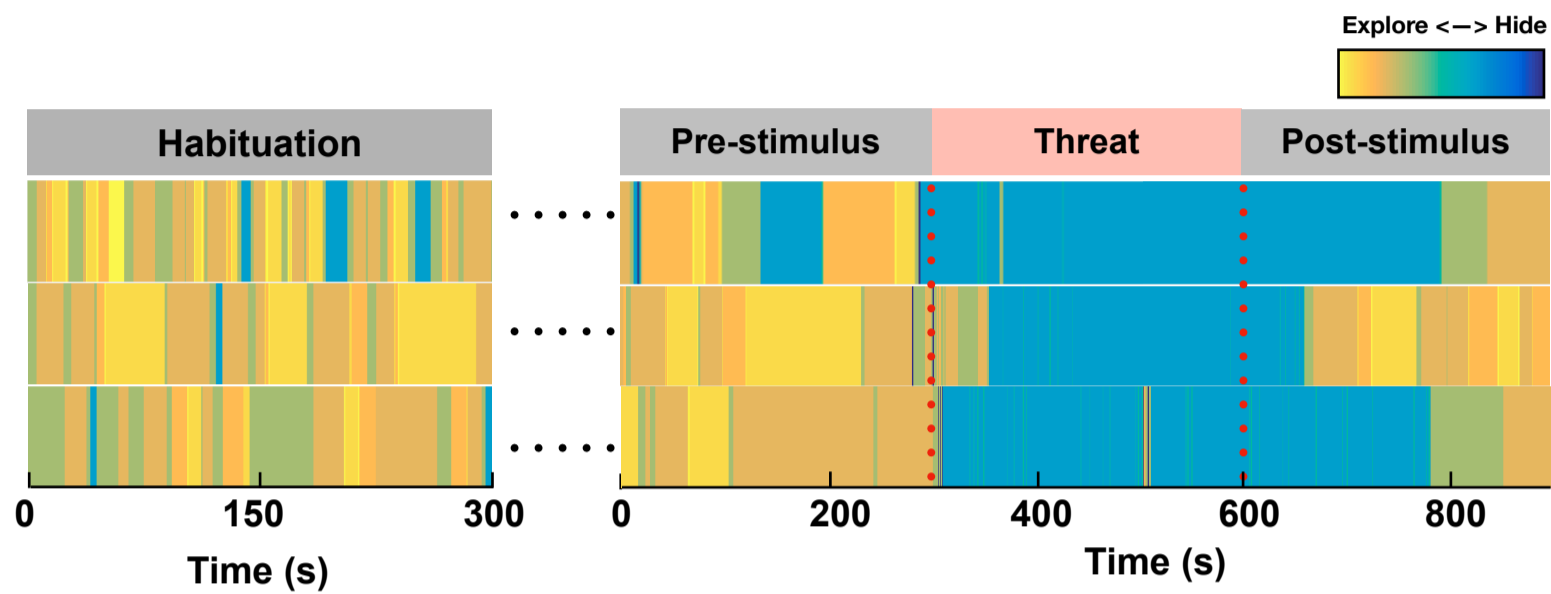**C**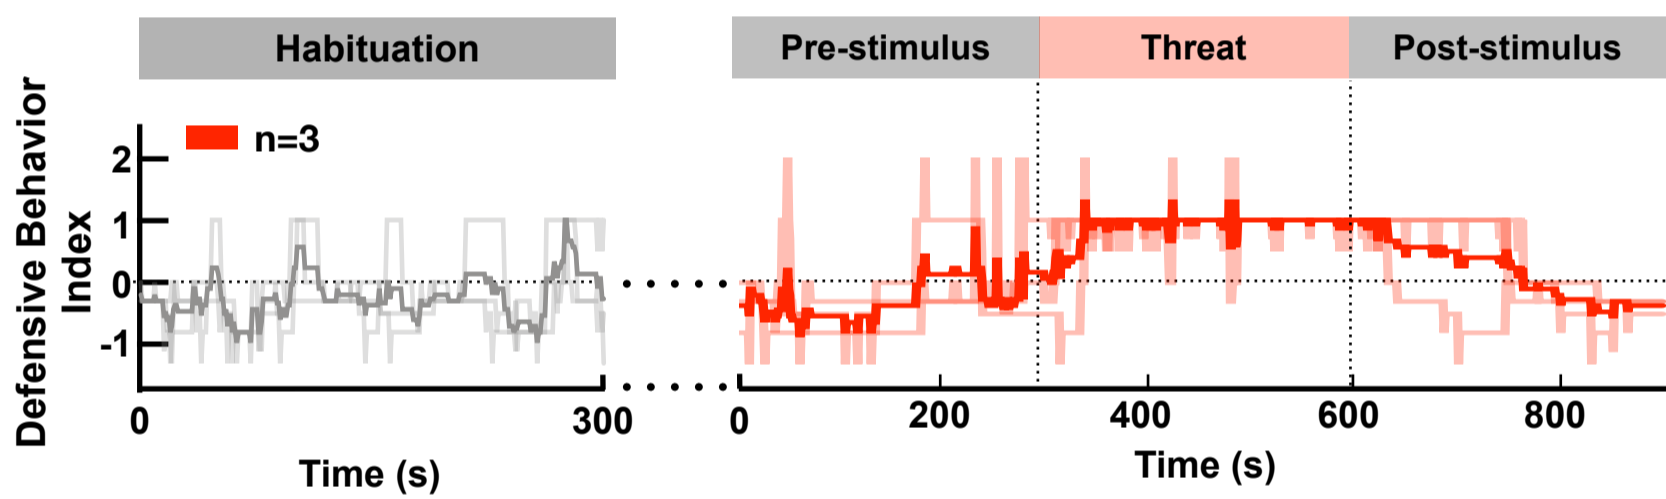**D**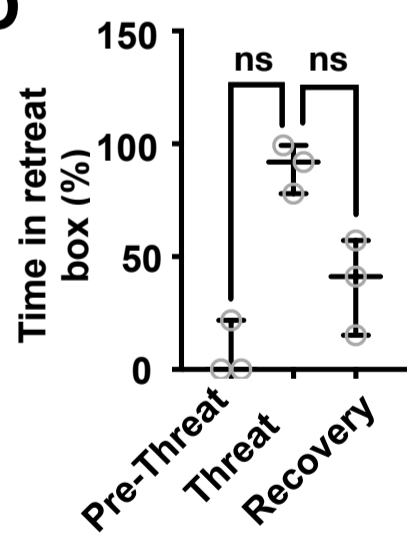**E**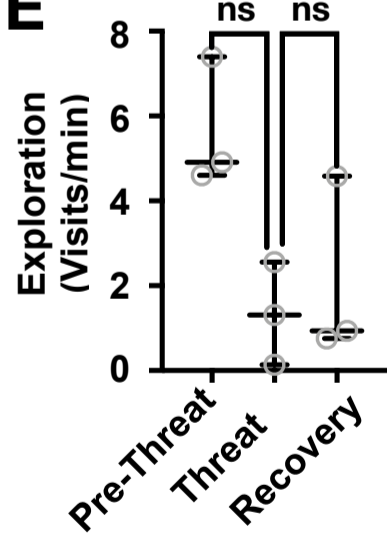**F**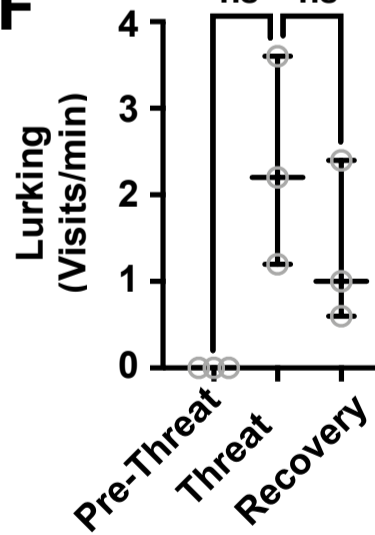**G**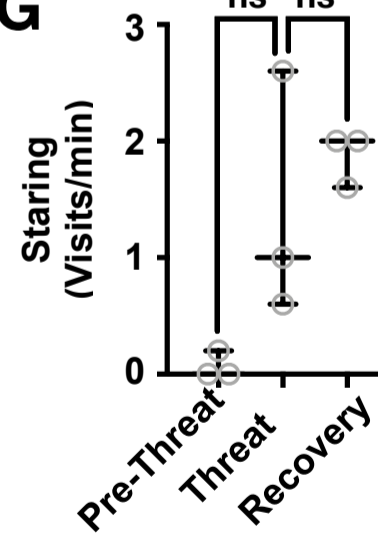**H**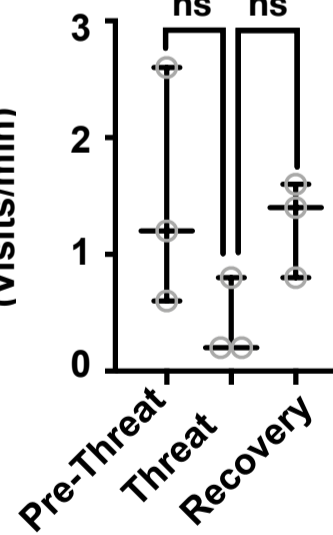

**Fig. S2**

**CONTROL CFOS**

**A**

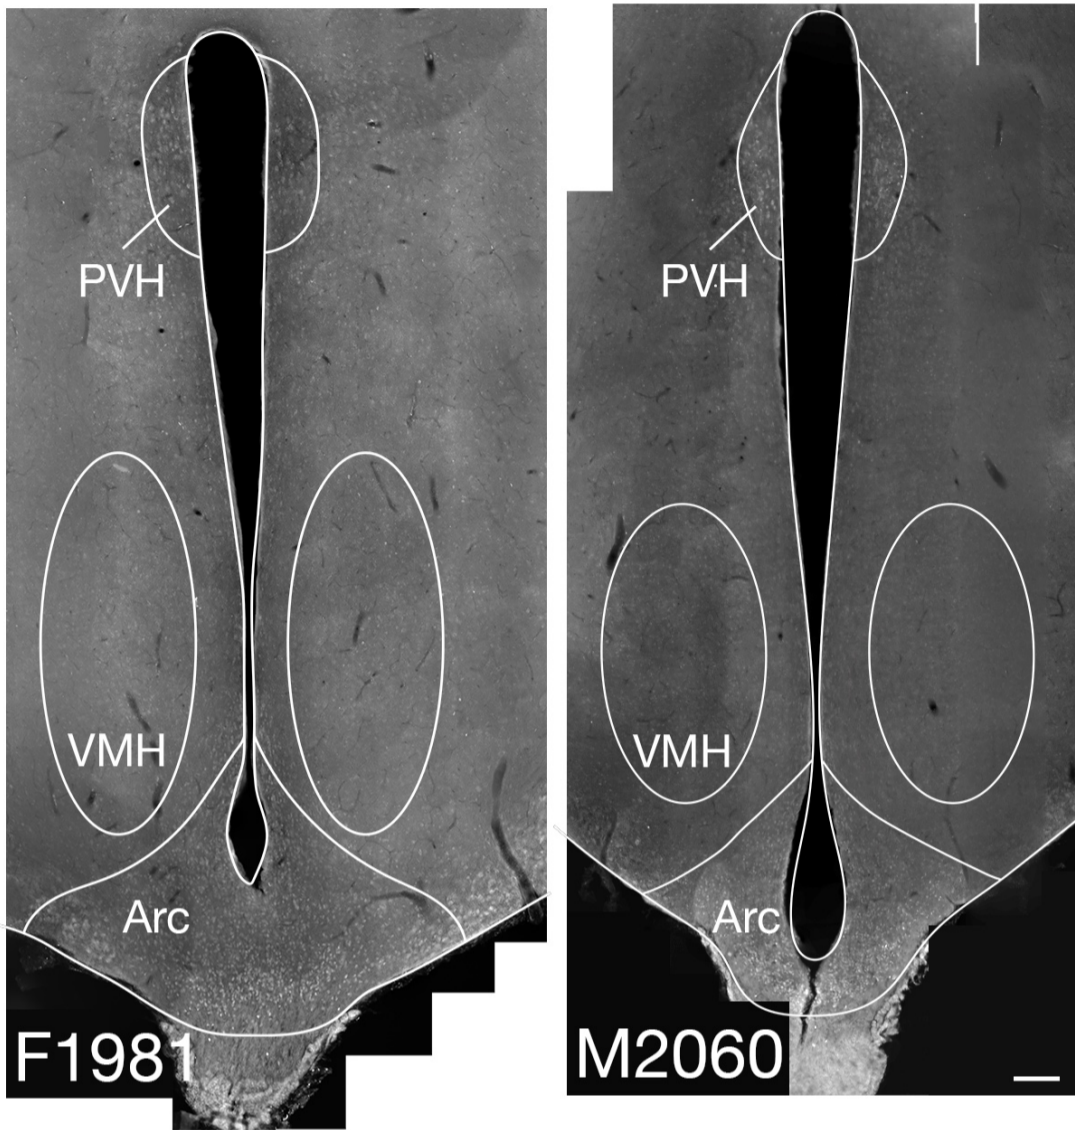

**B**

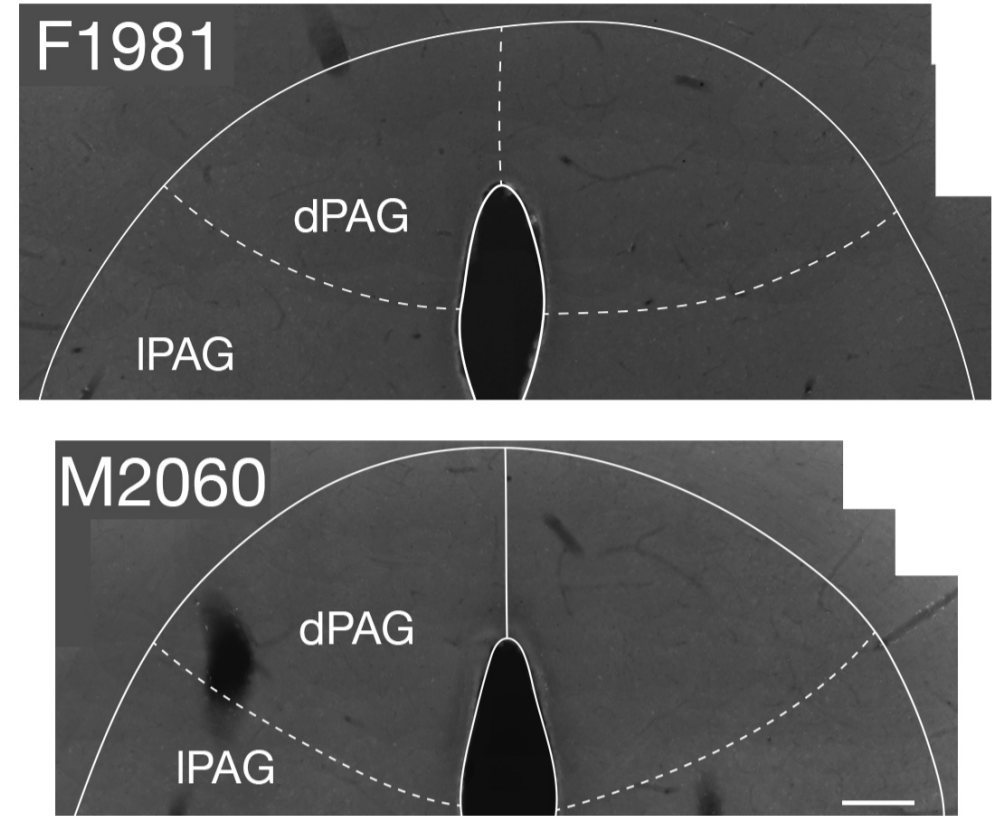

**Fig. S3**

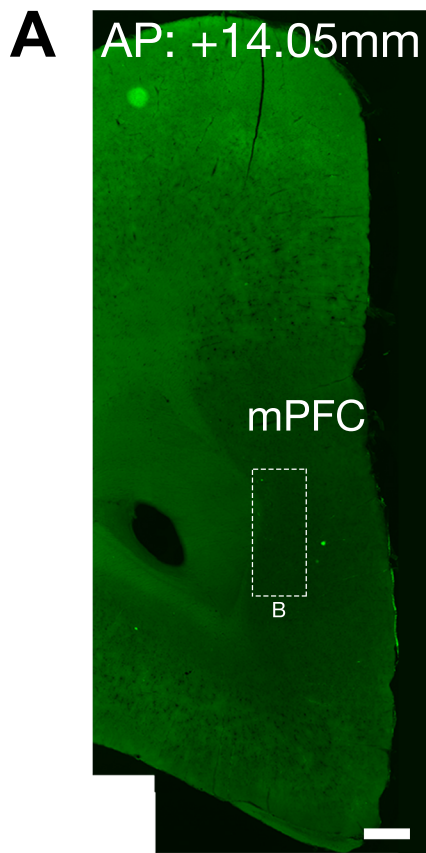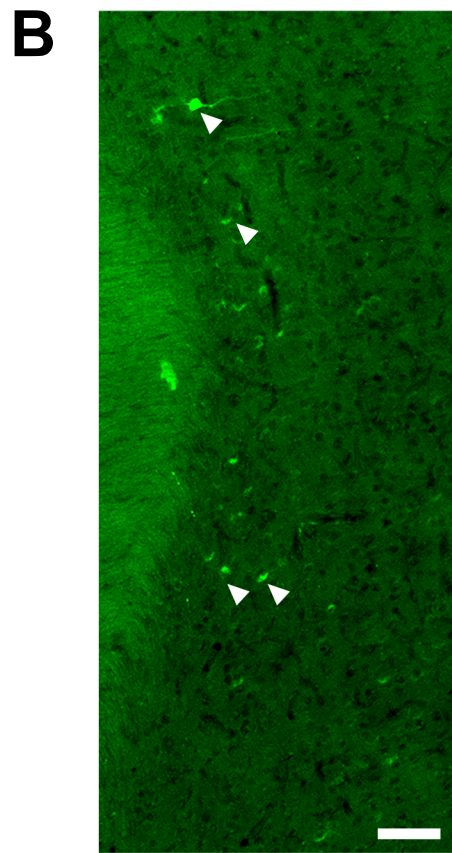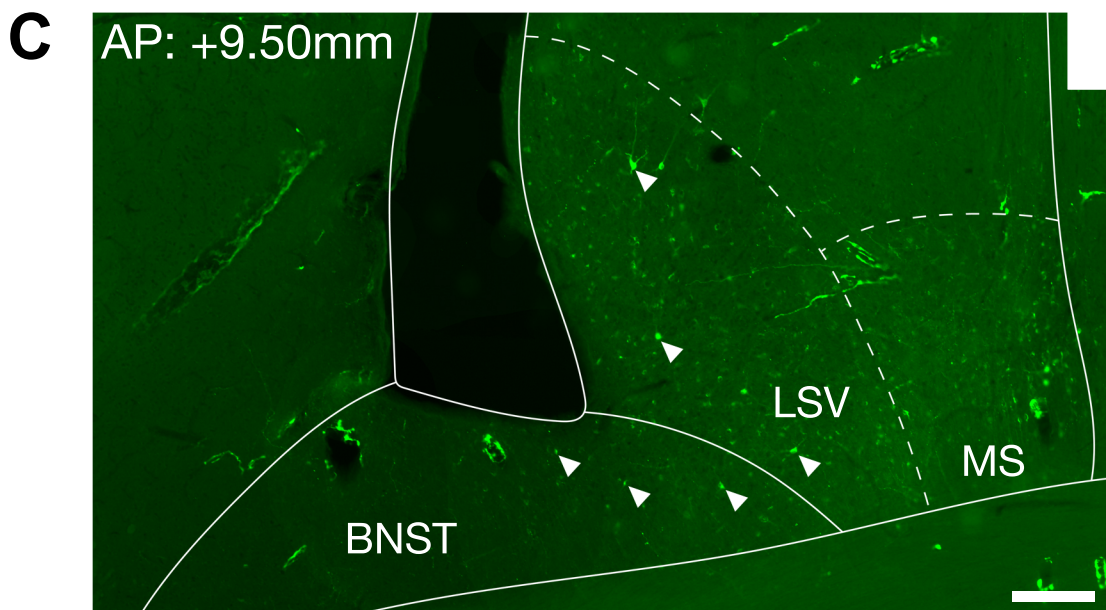



**Fig. S4**

**A** AP: +9.15mm

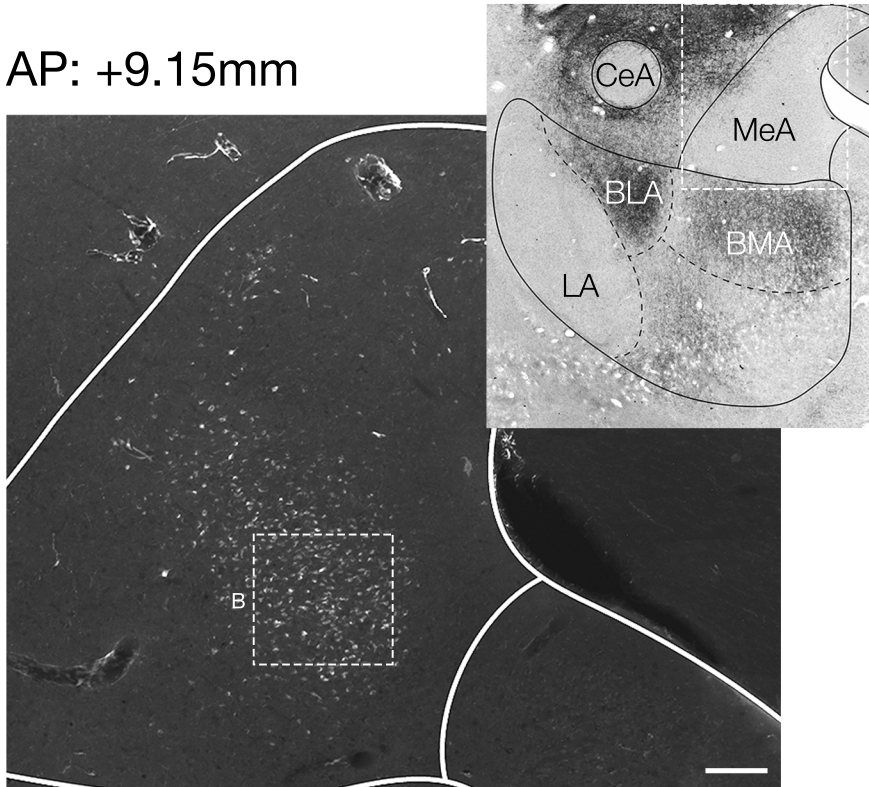

**B**

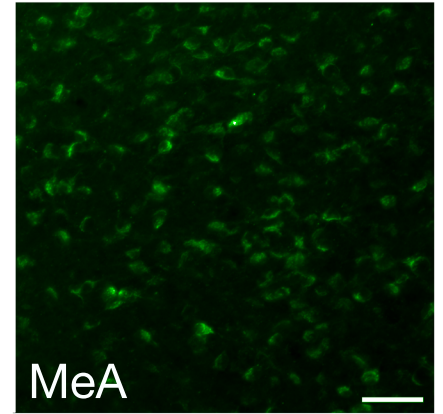

**C** AP: +8.65mm

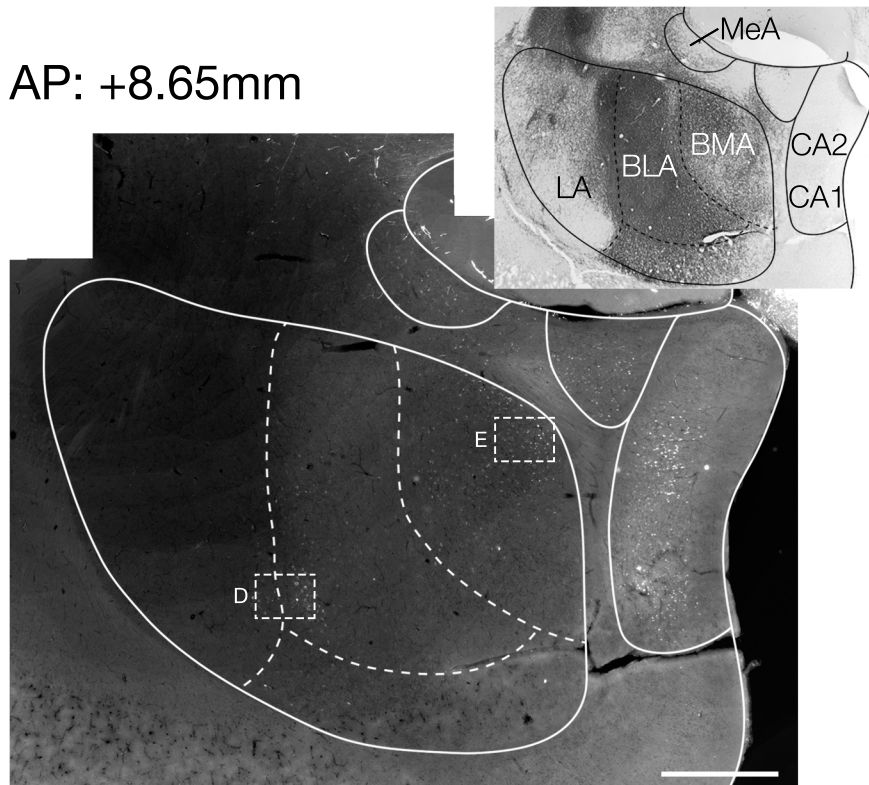

**D**

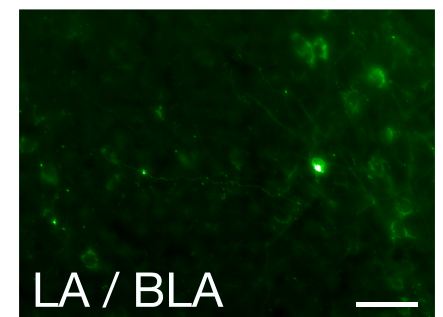

**E**

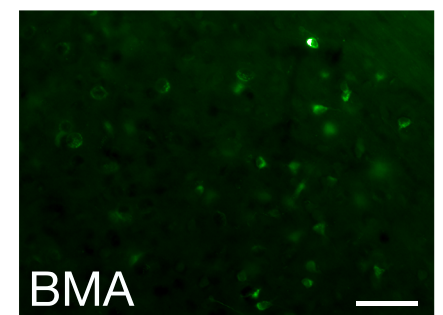



**Fig. S5**

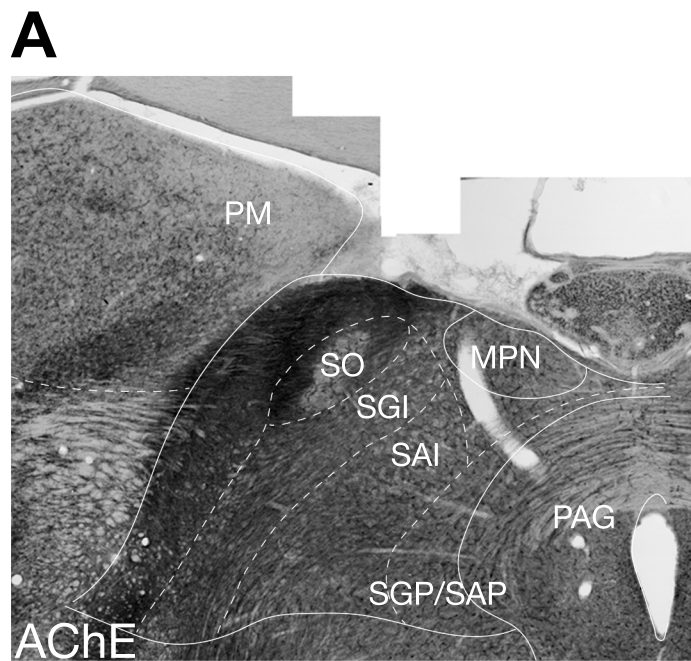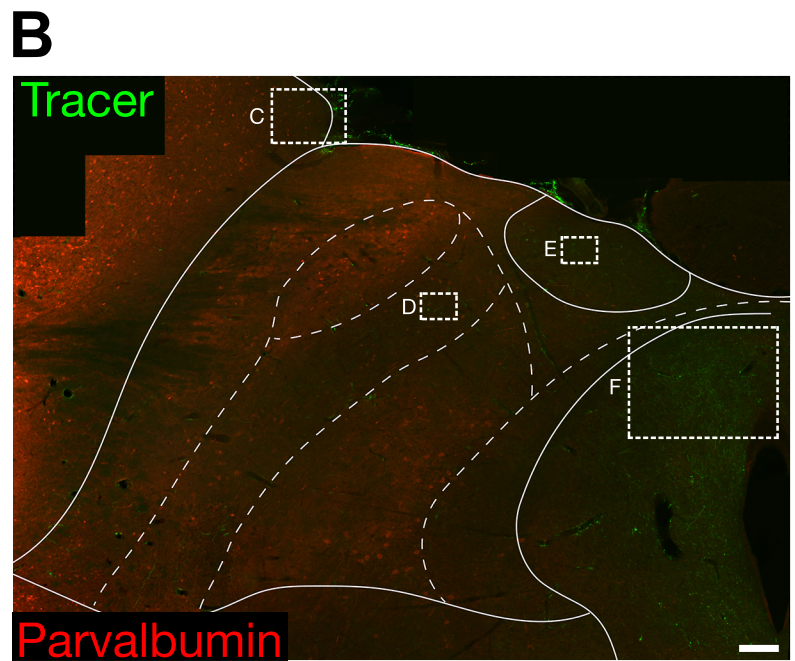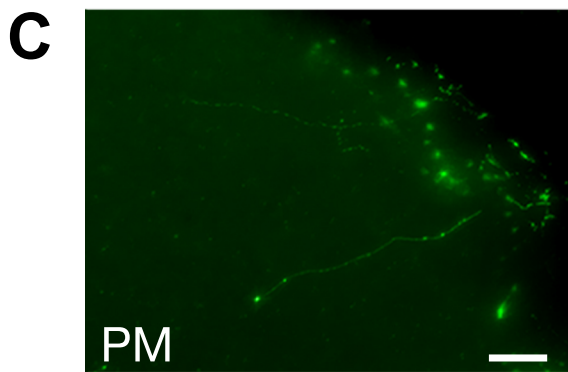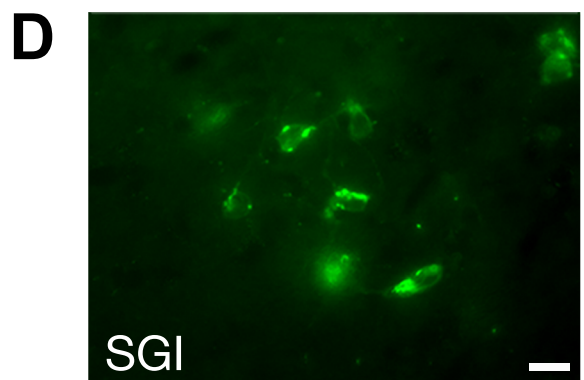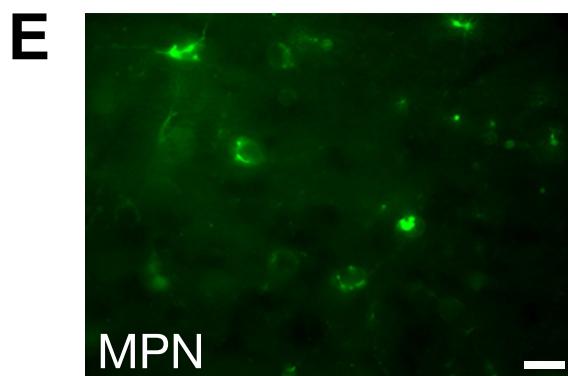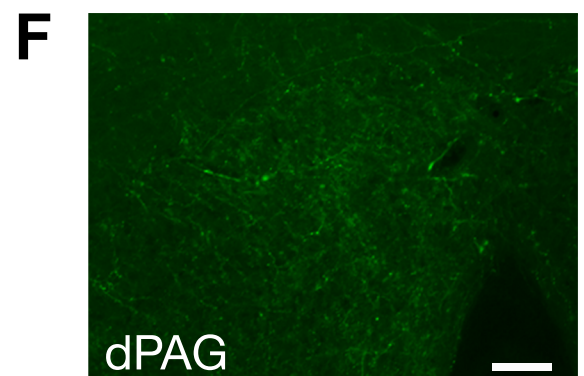

Supplement: 429_2020_2176_MOESM3_ESM.pdf [file 429_2020_2176_MOESM3_ESM.pdf]
